# Supplementary material
Source: Springer Nature journal article supplement (https://www.springermedizin.de/resource/supplementary/13054_2011_489_MOESM4_ESM.pdf/9708548)

## A. Hyperemic velocity (HV)

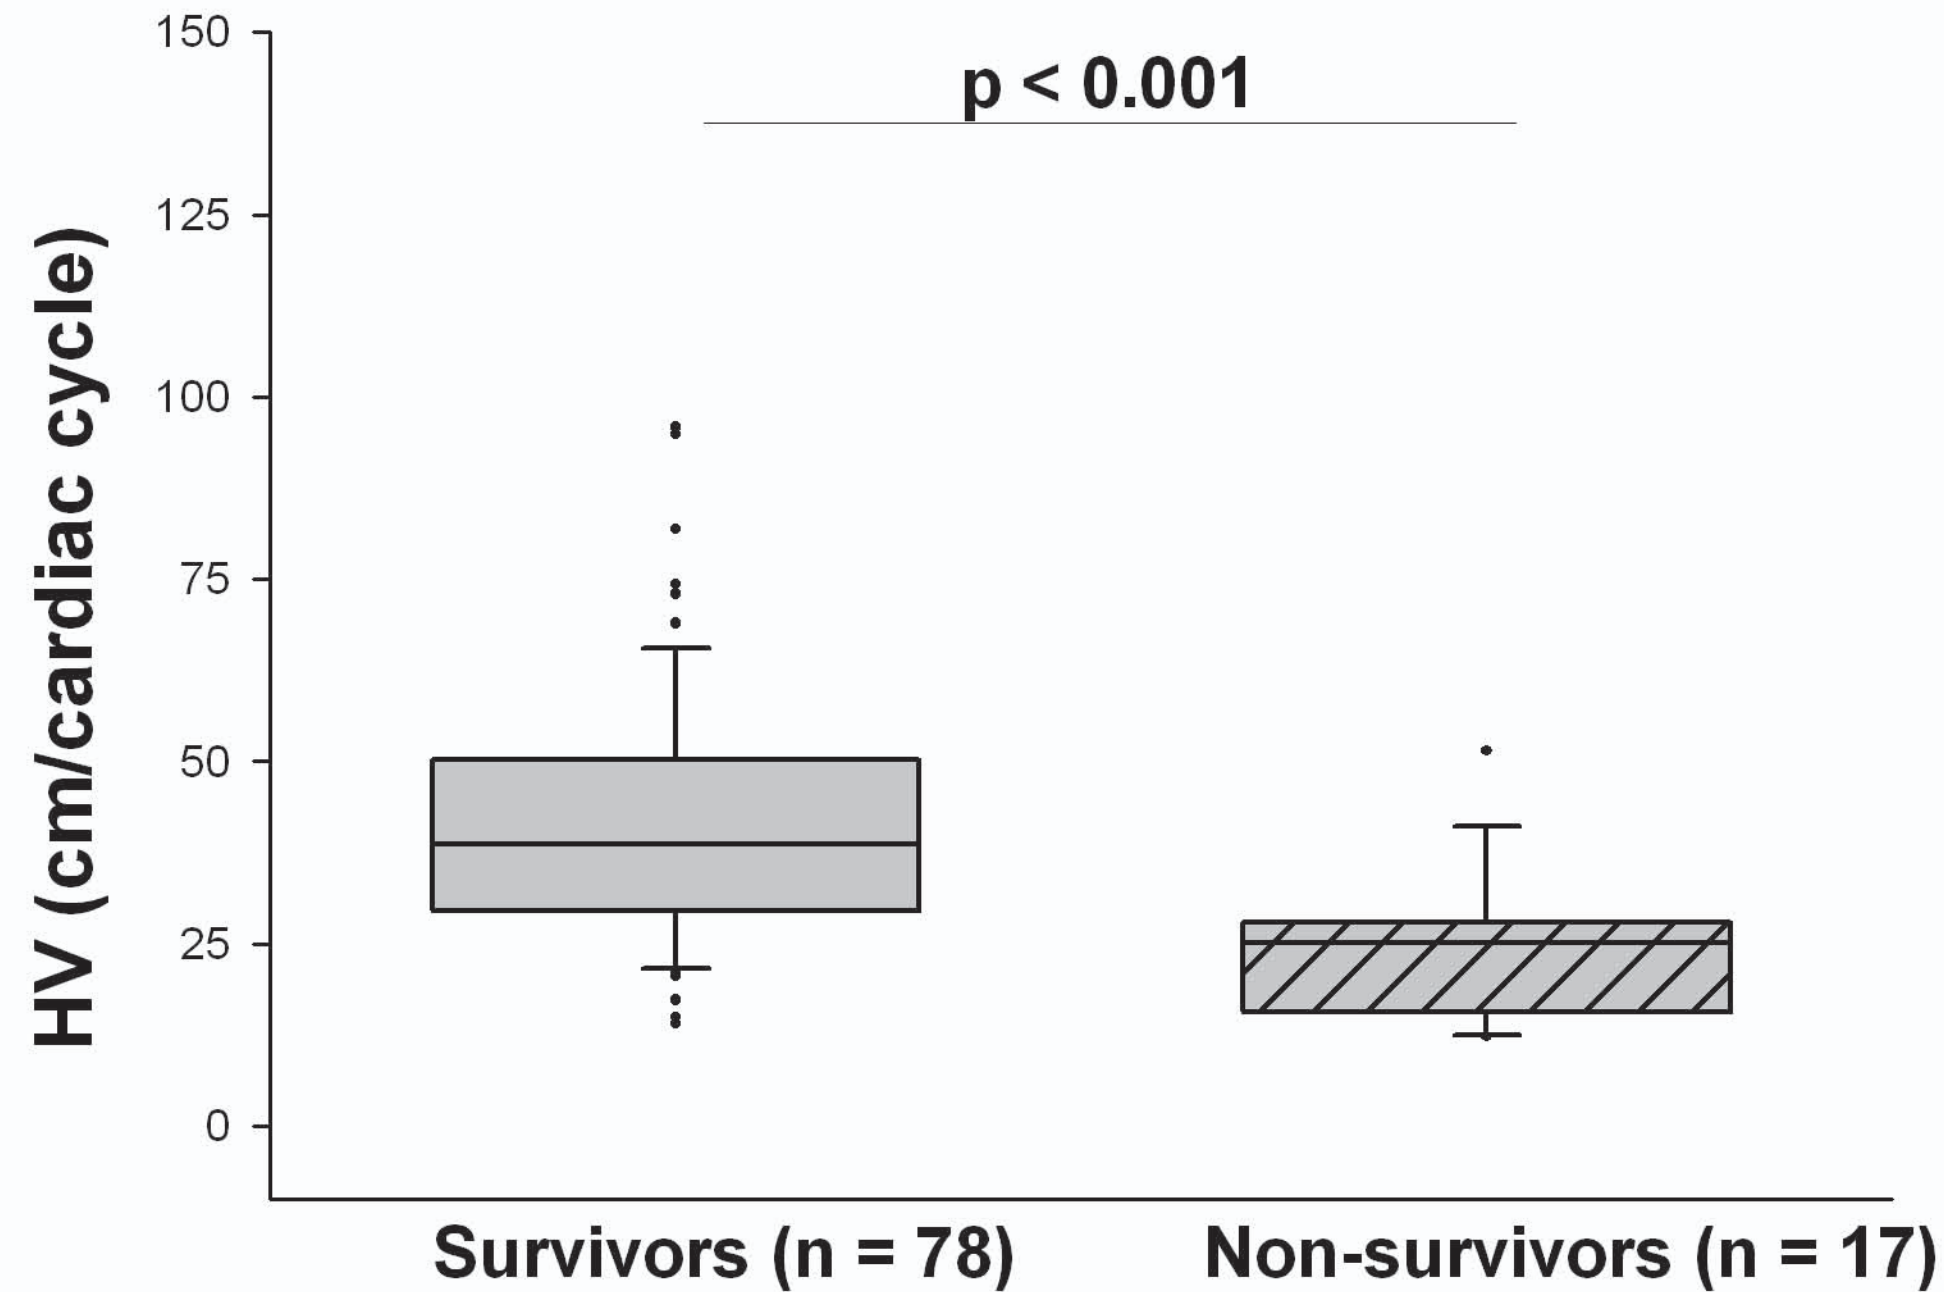

## B. Flow-Mediated Dilatation (FMD)

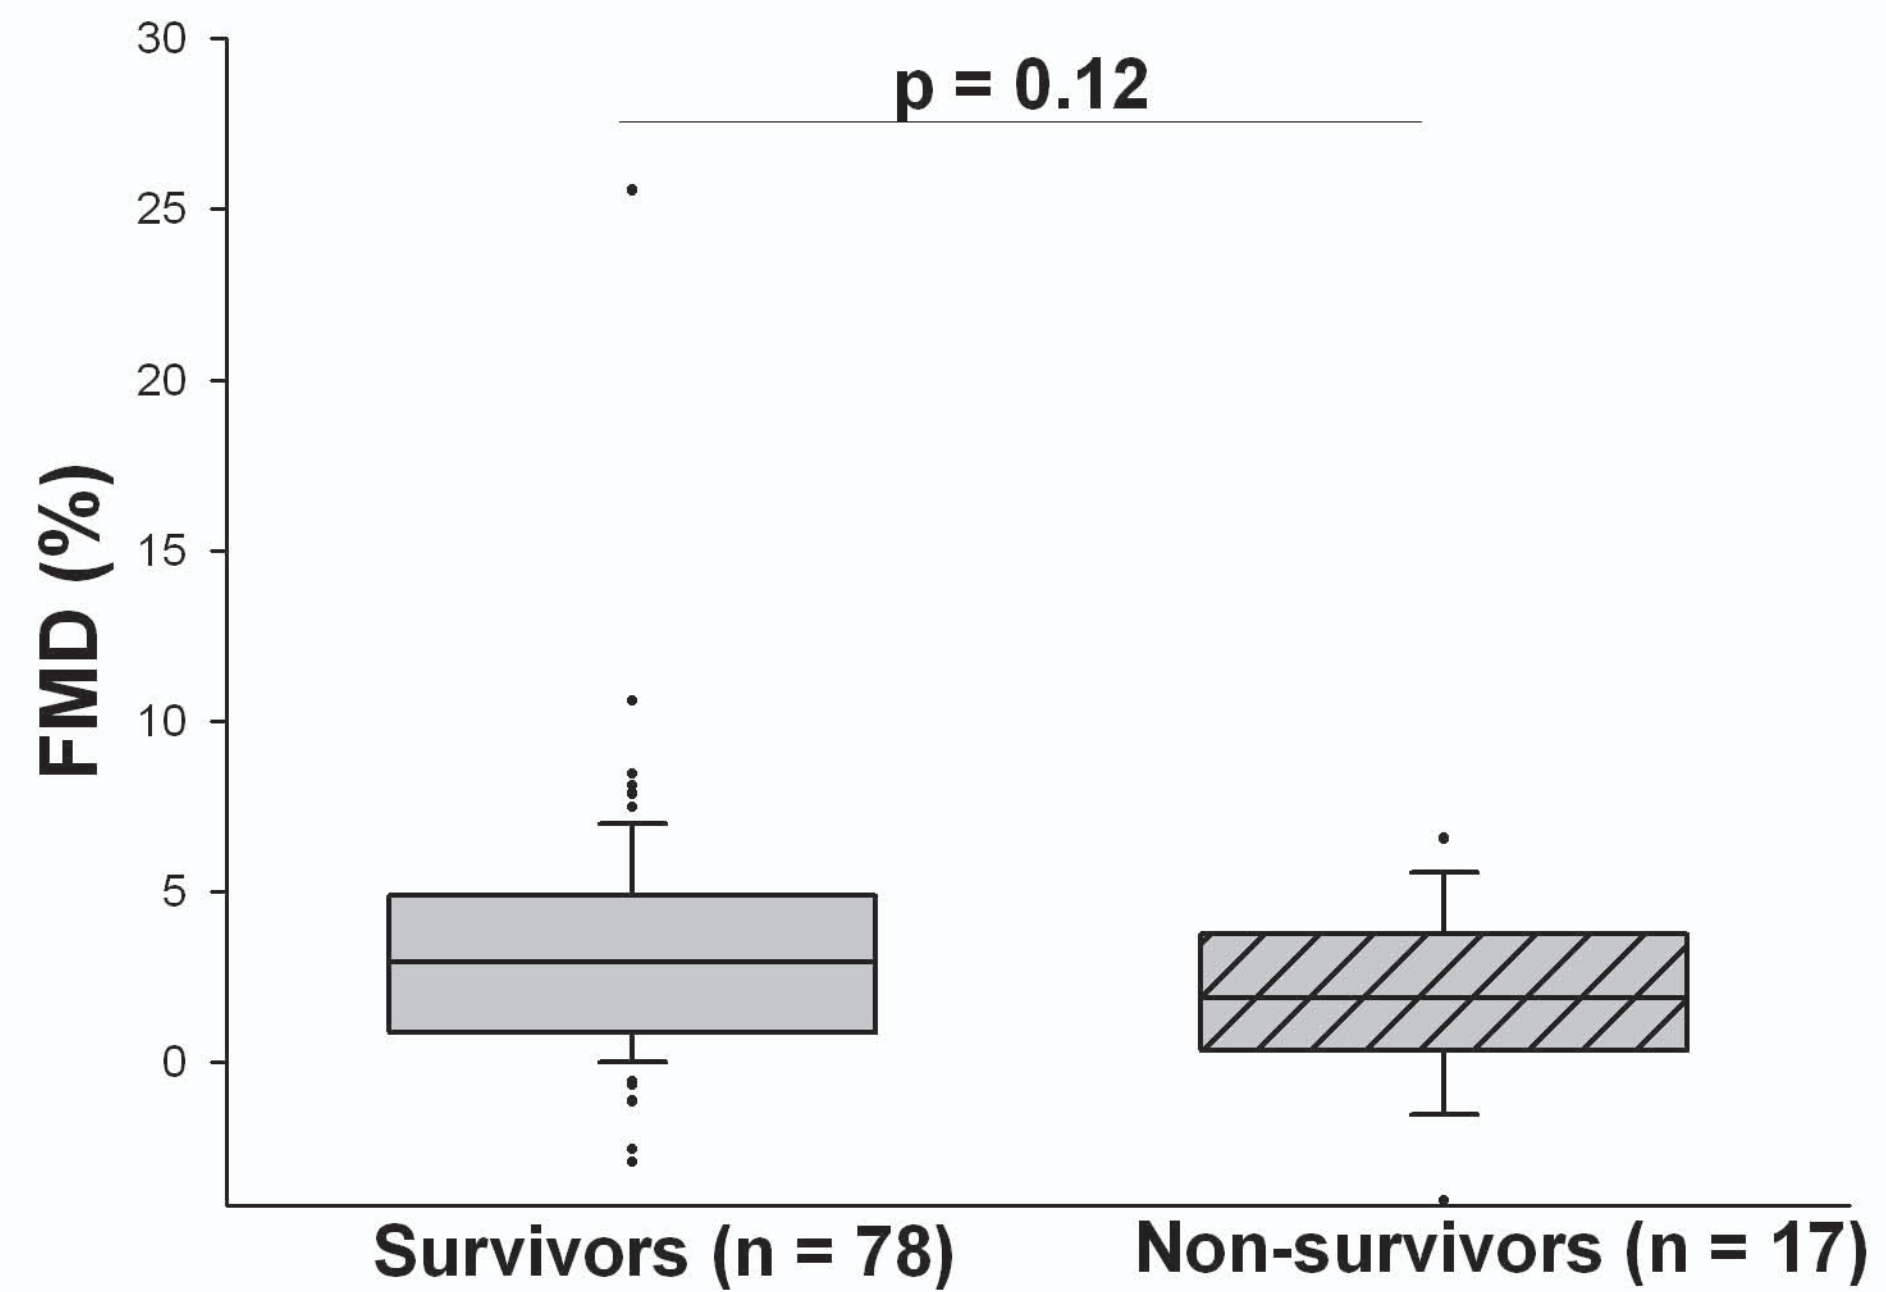

Supplement: MOESM4 [file 9708548]
